# Supplementary material for: “Barbie is a doctor, a lawyer, and so much more than that!”: perceiving gender inequalities is associated with higher professional aspirations
Source: Springer Nature journal article supplement (doi:10.1007/s12144-025-07817-9), 2025-04-22
Supplement: MOESM1 [file 12144_2025_7817_MOESM1_ESM.docx]

**Supplementary Materials**

**Table 1S.**

Demographic characteristics of Study 1 and Study 2 participants.

| **Demographic characteristics** | ***Study 1  N =* 418** | | ***Study 2  N =* 401** | |
| --- | --- | --- | --- | --- |
| ***n*** | **%** | ***n*** | **%** |
| **Gender** |  |  |  |  |
| Women | 412 | 98.56 | 399 | 99.50 |
| Non-binary | 6 | 1.44 | 2 | 0.50 |
| **Nationality** |  |  |  |  |
| Italian | 389 | 93.06 | 10 | 2.49 |
| Albanian | 4 | 0.96 | - | - |
| Indian | 1 | 0.24 | 1 | 0.25 |
| Bulgarian | 1 | 0.24 | - | - |
| Tunisian | 1 | 0.24 | - | - |
| Romanian | 1 | 0.24 | 2 | 0.25 |
| Swiss | 1 | 0.24 | - | - |
| Spanish | - | - | 337 | 84.04 |
| German | - | - | 2 | 0.50 |
| USA | - | - | 2 | 0.50 |
| Argentinian | - | - | 1 | 0.25 |
| Colombian | - | - | 2 | 0.50 |
| Venezuelan | - | - | 4 | 1.00 |
| Peruvian | - | - | 2 | 0.50 |
| Bolivian | - | - | 1 | 0.25 |
| Canadian | - | - | 1 | 0.25 |
| Chilean | - | - | 1 | 0.25 |
| French | - | - | 2 | 0.50 |
| Honduras | - | - | 1 | 0.25 |
| Mexican | - | - | 3 | 0.75 |
| Russian | - | - | 1 | 0.25 |
| Portuguese | - | - | 1 | 0.25 |
| Armenian | - | - | 1 | 0.25 |
| Chinese | - | - | 1 | 0.25 |
| Dutch | - | - | 2 | 0.50 |
| Ecuadorian | - | - | 4 | 1.00 |
| No answer provided | 20 | 4.78 | 19 | 4.72 |
| **Sexual orientation** |  |  |  |  |
| Heterosexual | 318 | 76.08 | 267 | 66.58 |
| Bisexual | 41 | 9.81 | 91 | 22.69 |
| Gay | 7 | 1.67 | 18 | 4.49 |
| Pansexual | 16 | 3.83 | 1 | 0.25 |
| Asexual | 2 | 0.48 | 2 | 0.50 |
| Other | 10 | 2.39 | 3 | 0.75 |
| Preferred not to say | 8 | 1.91 | 8 | 2.00 |
| No answer provided | 16 | 3.83 | 11 | 2.74 |
| **Area of Study** |  |  |  |  |
| Economy and management | 12 | 2.87 | 17 | 4.24 |
| Pharmacy and biotechnology | 24 | 5.74 | 8 | 2.00 |
| Law | 2 | 0.48 | 4 | 1.00 |
| Engineering and Architecture | 70 | 16.75 | 13 | 3.24 |
| Foreign language | 12 | 2.87 | 20 | 4.99 |
| Medicine and Surgery | 52 | 12.44 | 14 | 3.49 |
| Veterinary medicine | 1 | 0.24 | - | - |
| Psychology | 72 | 17.22 | 26 | 6.48 |
| Science (chemistry, biology, physics…) | 19 | 4.55 | 36 | 8.98 |
| Agro-food science | 4 | 0.96 | 2 | 0.50 |
| Educational Science | 10 | 2.39 | 63 | 15.71 |
| Motor science | 2 | 0.48 | - | - |
| Political science | 10 | 2.39 | 4 | 1.00 |
| Sociology | 39 | 9.33 | 46 | 11.47 |
| Mathematics and statistics | - | - | 3 | 0.75 |
| Humanistic area (Anthropology, cultural heritage…) | 71 | 16.99 | 11 | 2.74 |
| Criminology | - | - | 4 | 1.00 |
| Human resource | - | - | 57 | 14.21 |
| Tourism | - | - | 6 | 1.50 |
| Social work | - | - | 51 | 12.72 |
| No answer provided | 18 | 4.31 | 15 | 3.74 |

**Additional analyses: Comparisons among perceived gender inequalities subscales and professional aspirations (Study 1)**

A series of paired sample t-tests among the subscales of perceived gender inequalities was conducted, to evaluate if the mean scores for the subscales of perceived gender inequalities were statistically different to one another. Results indicated that overall participants valued domestic imbalance (*M* = 5.77, *SD* = 1.02) significantly lower than workplace inequality (*M* = 5.90, *SD* = 0.89), with *t*(417) = -2.59, *p* = .010; significantly lower than harassment towards women (*M* = 6.45, *SD* = 0.63), with *t*(417) = -14.54, *p* < .001; and significantly higher than social expectations (*M* = 5.33, *SD* = 1.06), with *t*(417) = -7.63, *p* < .001. Furthermore, perceived workplace inequalities were significantly lower than harassment toward women, with *t*(417) = -15.58, *p* < .001, and significantly higher than social expectations, with *t*(417) = 12.73, *p* < .001. Last, perceived harassment toward women was rated as significantly higher than social expectations, with *t*(417) = 26.65, *p* < .001.

Additionally, we compared participants’ scores on the two contingencies through another paired t-test. Results indicated that overall participants valued academic competence (*M* = 5.61, *SD* = .98) significantly higher than competition (*M* = 4.71, SD = 1.38), *t*(417) = 14.55, *p* < .001. We also ran paired t-tests between leadership and achievement and educational aspirations to evaluate whether there was a statistically significant difference between the two types of professional aspirations. Results indicated that the mean of educational aspirations (*M* = 6.07, *SD* = .89) was significantly higher than that of leadership and achievement aspirations (*M* = 5.35, *SD* = 1.00), *t*(417) = 12.75, *p* < .001.

**Additional analyses: Comparing mean scores among STEM students and non-STEM students (Study 1)**

Based on their field of study, we categorized participants into STEM (science, technology, engineering, and math; 93 participants, corresponding to 22.25% of the total sample) and non-STEM students (307 participants, corresponding to 73.44%). Eighteen participants (4.31%) were not categorized as they did not indicate their field of study.

To evaluate whether there was a difference between the mean scores in perceptions of gender inequalities, achievement-related contingencies of self-worth, and professional aspirations of students enrolled in STEM and non-STEM faculties, a series of independent samples t-tests were conducted.

**Table 2S*.****Results of the independent sample t-tests between STEM and non-STEM students.*

| Dependent variables | STEM students | | Non-STEM students | | *t* (398) | *p* |
| --- | --- | --- | --- | --- | --- | --- |
| *M* | *SD* | *M* | *SD* |
| Domestic imbalance | 5.72 | 0.99 | 5.78 | 1.04 | -0.50 | .620 |
| **Harassment toward women** | 6.33 | 0.62 | 6.49 | 0.63 | -2.27 | .024 |
| Workplace inequalities | 5.83 | 0.83 | 5.94 | 0.90 | -1.07 | .285 |
| Social expectations | 5.26 | 1.06 | 5.37 | 1.05 | -0.85 | .397 |
| CSW – Academic competence | 5.72 | 0.89 | 5.57 | 1.01 | 1.27 | .206 |
| CSW - Competition | 4.85 | 1.29 | 4.65 | 1.39 | 1.25 | .211 |
| Leadership and achievement aspirations | 5.46 | 1.00 | 5.32 | 1.00 | 1.18 | .239 |
| **Educational aspirations** | 5.76 | 1.05 | 6.15 | 0.89 | -3.75 | .000 |

*Note*. Bolded variables indicate significant differences between the corresponding means of the two groups.

|  | Leadership and Achievement Aspirations | Educational Aspirations |
| --- | --- | --- |
|  | *ß* (SE)  [95% CI] | *ß* (SE)  [95% CI] |
| Domestic Imbalance 🡪 CSW – Academic Competence | .004 (.006)  [-.007, .015] | .008 (.010)  [-.012, .029] |
| Domestic Imbalance 🡪 CSW – Competition | .037* (.015)  [.006, .067] | -.003 (.008)  [-.019, .012] |
| Harassment toward Women 🡪 CSW – Academic Competence | .013 (.009)  [-.006, .031] | .025 (.014)  [-.003, .054] |
| Harassment toward Women 🡪 CSW – Competition | .017 (.017)  [-.016, .050] | -.002 (.004)  [-.009, .006] |
| Workplace Inequalities 🡪 CSW – Academic Competence | .015 (.010)  [-.005, .035] | .029* (.015)  [.001, .058] |
| Workplace Inequalities 🡪 CSW – Competition | .009 (.016)  [-.023, .041] | -.001 (.002)  [-.006, .004] |
| Social Expectations 🡪 CSW – Academic Competence | -.013 (.009)  [-.032, .005] | -.026 (.014)  [-.054, .001] |
| Social Expectations 🡪 CSW – Competition | -.026 (.017)  [-.059, .007] | .002 (.006)  [-.009, .014] |

**Table 3S*.***

*Indirect associations between the observed variables in the model (Study 1).*

*Note*. * *p* < .05; ** *p* < .01; *** *p* < .001.

**Additional analyses: Testing the model considering students' enrollment in STEM vs non-STEM faculties as a covariate (Study 1)**

To evaluate possible differences in our model between women enrolled in STEM versus non-STEM courses, we also conducted the same analyses controlling for their enrollment.

**Table 4S*.***

*Direct associations between the observed variables in the model with covariate (Study 1).*

|  | CSW – Academic competence | CSW – Competition | Leadership and achievement aspirations | Educational aspirations |
| --- | --- | --- | --- | --- |
|  | *ß* (SE)  [95% CI] | *ß* (SE)  [95% CI] | *ß* (SE)  [95% CI] | *ß* (SE)  [95% CI] |
| Domestic imbalance | .054 (.054)  [-.052, .160] | .148** (.054)  [.042, .254] | -.016 (.053)  [-.119, .088] | -.028 (.054)  [-.133, .077] |
| Harassment toward women | .115 (.067)  [-.016, .246] | .074 (.068)  [-.058, .206] | -.068 (.065)  [-.195, .059] | .119 (.066)  [-.010, .247] |
| Workplace inequalities | .154* (.064)  [.029, .279] | .033 (.065)  [-.094, .160] | -.057 (.062)  [-.178, .065] | .051 (.063)  [-.072, .175] |
| Social expectations | -.120 (.063)  [-.244, .004] | -.108 (.064)  [-.233, .017] | .248*** (.060)  [.129, .366] | -.033 (.062)  [-.155, .089] |
| CSW – Academic competence |  |  | .083 (.054)  [-.023, .189] | .188** (.054)  [.081, .294] |
| CSW – Competition |  |  | .248*** (.053)  [.145, .351] | -.014 (.055)  [-.121, .093] |
| STEM vs non-STEM *a* | .081 (.049)  [-.015, .177] | .072 (.049)  [-.025, .169] | .038 (.047)  [-.055, .130] | -.182*** (.047)  [-.275, -.089] |

*Note.* Standardized coefficients; ****p* < .001, ***p* < .01, **p* < .05.
*a*. Student group was coded as 1 = STEM students, 0 = non-STEM students.

The significance and the direction of the effects in this model is comparable to the model without covariate. The only differences lie in the associations between harassment toward women and academic competence (*p* = .086), social expectations and academic competence (*p* = .058), and harassment toward women and educational aspirations (*p* = .070), which are not significant anymore. Given that these analyses were conducted on a smaller sample, just reaching the recommended size for complex mediation analyses, it is likely that some of these effects, which are trending toward significance, may become significant with a larger sample.

**Table 5S*.***

*Indirect associations between the observed variables in the model with covariate (Study 1).*

|  | Leadership and Achievement Aspirations | Educational Aspirations |
| --- | --- | --- |
|  | *ß* (SE)  [95% CI] | *ß* (SE)  [95% CI] |
| Domestic Imbalance 🡪 CSW – Academic Competence | .004 (.005)  [-.006, .015] | .010 (.011)  [-.011, .031] |
| Domestic Imbalance 🡪 CSW – Competition | .037* (.016)  [.006, .067] | -.002 (.008)  [-.018, .014] |
| Harassment toward Women 🡪 CSW – Academic Competence | .009 (.008)  [-.007, .026] | .022 (.014)  [-.006, .049] |
| Harassment toward Women 🡪 CSW – Competition | .018 (.017)  [-.015, .052] | -.001 (.004)  [-.009, .007] |
| Workplace Inequalities 🡪 CSW – Academic Competence | .013 (.010)  [-.007, .032] | .029* (.015)  [.000, .058] |
| Workplace Inequalities 🡪 CSW – Competition | .008 (.016)  [-.023, .040] | .000 (.002)  [-.004, .004] |
| Social Expectations 🡪 CSW – Academic Competence | -.010 (.008)  [-.026, .006] | -.023 (.014)  [-.049, .004] |
| Social Expectations 🡪 CSW – Competition | -.027 (.017)  [-.060, .006] | .002 (.006)  [-.010, .013] |

*Note*. * *p* < .05; ** *p* < .01; *** *p* < .001.

In terms of indirect effects, there were no differences between this model and the one without the covariate reported in the manuscript.

**Additional analyses: Comparisons among perceived gender inequalities subscales and professional aspirations (Study 2)**

To assess if the mean scores for the subscales of perceived gender inequalities were statistically different from each other, we ran a series of paired sample t-tests among the subscales of perceived gender inequalities.

Results indicated that overall participants valued domestic imbalance (*M* = 5.77, *SD* = 1.02) significantly lower than workplace inequality (*M* = 5.90, *SD* = 0.89), with *t*(417) = -2.59, *p* = .010; significantly lower than harassment towards women (*M* = 6.45, *SD* = 0.63), with *t*(417) = -14.54, *p* < .001; and significantly higher than social expectations (*M* = 5.33, *SD* = 1.06), with *t*(417) = -7.63, *p* < .001. Furthermore, perceived workplace inequalities were significantly lower than harassment toward women, with *t*(417) = -15.58, *p* < .001, and significantly higher than social expectations, with *t*(417) = 12.73, *p* < .001. Last, perceived harassment toward women was rated as significantly higher than social expectations, with *t*(417) = 26.65, *p* < .001.

Furthermore, we conducted another paired t-test to assess participants’ scores on the two achievement-related contingencies. Results indicated that overall participants valued the contingency of academic competence (*M* = 5.32, *SD* = .98) significantly higher than that of competition (*M* = 4.57, *SD* = 1.23), *t*(396) = 13.36, *p* < .001. Additionally, we conducted one last paired t-test between leadership and achievement and educational aspirations. Results indicated that participants’ rating of their educational aspirations (*M* = 5.66, *SD* = 1.30) was significantly higher than that of leadership and achievement aspirations (*M* = 4.90, *SD* = 1.09), *t*(396) = 12.71, *p* < .001.

**Additional analyses: Comparing mean scores among STEM students and non-STEM students (Study 2)**

Like in the previous study, based on their field of study, we categorized participants into STEM (54 participants, corresponding to 13.47% of the total sample) and non-STEM students (332 participants, corresponding to 82.79%). 15 participants (3.74%) were not categorized as they did not indicate their field of study. A series of independent samples t-tests were performed to evaluate whether there was a difference between the mean scores in perceptions of gender inequalities, achievement-related contingencies of self-worth, professional aspirations, and academic effort of students enrolled in STEM (*n* = 54) and non-STEM faculties (*n* = 332).

**Table 6S*.****Results of the independent sample t-tests between STEM and non-STEM students.*

| Dependent variables | STEM students | | Non-STEM students | | *t* (384) | *p* |
| --- | --- | --- | --- | --- | --- | --- |
| *M* | *SD* | *M* | *SD* |
| Domestic imbalance | 5.75 | 1.13 | 5.80 | 1.12 | -0.32 | .751 |
| Harassment toward women | 6.23 | 0.98 | 6.46 | 0.77 | -1.96 | .050 |
| Workplace inequalities | 5.23 | 1.12 | 5.54 | 1.11 | -1.58 | .114 |
| Social expectations | 4.78 | 1.24 | 5.00 | 1.21 | -1.26 | .210 |
| Academic competence | 5.38 | 0.89 | 5.34 | 0.96 | 0.29 | .772 |
| Competition | 4.42 | 1.25 | 4.62 | 1.20 | -1.13 | .258 |
| Leadership and achievement aspirations | 4.83 | 1.04 | 4.91 | 1.09 | -0.52 | .605 |
| Educational aspirations | 5.77 | 1.28 | 5.65 | 0.89 | .062 | .384 |
| Academic effort | 5.38 | 1.15 | 5.15 | 1.16 | 1.27 | .205 |

*Note*. Bolded variables indicate significant differences between the corresponding means of the two groups.

**Table 7S*.***

*Indirect associations between the observed variables in the model (Study 2).*

|  | Leadership and Achievement Aspirations | Educational Aspirations | Academic Effort |
| --- | --- | --- | --- |
|  | *ß* (SE)  [95% CI] | *ß* (SE)  [95% CI] | *ß* (SE)  [95% CI] |
| Domestic Imbalance 🡪 CSW – Academic Competence | .034* (.015)  [.004, .064] | .044* (.018)  [.009, .080] | .053* (.021)  [.011, .094] |
| Domestic Imbalance 🡪 CSW – Competition | .011 (.011)  [-.009, .032] | -.012 (.010)  [-.032, .008] | -.013 (.012)  [-.036, .009] |
| Harassment toward Women 🡪 CSW – Academic Competence | .029 (.015)  [-.001, .059] | .038* (.018)  [.002, .074] | .045* (.022)  [.003, .087] |
| Harassment toward Women 🡪 CSW – Competition | .005 (.006)  [-.007, .018] | -.006 (.006)  [-.018, .007] | -.007 (.007)  [-.021, .008] |
| Workplace Inequalities 🡪 CSW – Academic Competence | .009 (.013)  [-.017, .034] | .011 (.017)  [-.022, .044] | .013 (.020)  [-.026, .053] |
| Workplace Inequalities 🡪 CSW – Competition | .002 (.005)  [-.007, .011] | -.002 (.005)  [-.011, .008] | -.002 (.005)  [-.013, .009] |
| Social Expectations 🡪 CSW – Academic Competence | .010 (.012)  [-.015, .034] | .013 (.016)  [-.019, .044] | .015 (.019)  [-.022, .053] |
| Social Expectations 🡪 CSW – Competition | .004 (.005)  [-.007, .015] | -.004 (.005)  [-.015, .006] | -.005 (.006)  [-.017, .007] |

*Note*. * *p* < .05; ** *p* < .01; *** *p* < .001.

**Additional analyses: Testing the model considering students' enrollment in STEM vs non-STEM faculties as a covariate (Study 2)**

To evaluate possible differences in our model between women enrolled in STEM versus non-STEM courses, we also conducted the same analyses controlling for their enrollment.

The significance and the direction of the effects in this model are the same as those in the model without covariate, except for the association between harassment toward women and leadership and achievement aspirations (*p* = .060), which is not significant anymore.

**Table 8S*.***

|  | CSW – Academic Competence | CSW – Competition | Leadership and Achievement Aspirations | Educational Aspirations | Academic Effort |
| --- | --- | --- | --- | --- | --- |
|  | *ß* (SE)  [95% CI] | *ß* (SE)  [95% CI] | *ß* (SE)  [95% CI] | *ß* (SE)  [95% CI] | *ß* (SE)  [95% CI] |
| Domestic Imbalance | .162** (.060)  [.044, .280] | .175** (.061)  [.056, .294] | -.107 (.062)  [-.228, .015] | -.020 (.060)  [-.139, .098] | -.010 (.064)  [-.135, .115] |
| Harassment toward Women | .129* (.065)  [.002, .256] | .037 (.066)  [-.092, .166 | .124 (.066)  [-.005, .252] | .253*** (.063)  [.129, .377] | .105 (.069)  [-.031, .241] |
| Workplace Inequalities | .021 (.066)  [-.108, .150] | .011 (.067)  [-.120, .142] | -.006 (.066)  [-.136, .124] | -.069 (.065)  [-.196, .057] | .053 (.068)  [-.081, .187] |
| Social Expectations | .038 (.062)  [-.084, .160] | -.054 (.063)  [-.069, .178] | .035 (.063)  [-.088, .159] | .021 (.061)  [-.099, .141] | -.019 (.067)  [-.150, .112] |
| CSW – Academic Competence |  |  | .180** (.056)  [.070, .291] | .236*** (.054)  [.130, .343] | .285*** (.059)  [.170, .400] |
| CSW – Competition |  |  | .065 (.056)  [-.045, .175] | -.060 (.055)  [-.167, .047] | -.075 (.061)  [-.195, .044] |
| STEM vs non-STEM *a* | -.034 (.049)  [-.084, .160] | -.047 (.050)  [-.144, .050] | -.013 (.050)  [-.110, .084] | .045 (.048)  [-.050, .140] | .069 (.051)  [-.031, .168] |

*Direct associations between the observed variables in the model with covariate (Study 2).*

*Note.* Standardized coefficients; ****p* < .001, ***p* < .01, **p* < .05. *a*. Student group was coded as 1 = STEM students, 0 = non-STEM students.

|  | Leadership and Achievement Aspirations | Educational Aspirations | Academic Effort |
| --- | --- | --- | --- |
|  | *ß* (SE)  [95% CI] | *ß* (SE)  [95% CI] | *ß* (SE)  [95% CI] |
| Domestic Imbalance 🡪 CSW – Academic Competence | .029* (.014)  [.001, .057] | .038* (.017)  [.005, .071] | .046* (.020)  [.008, .085] |
| Domestic Imbalance 🡪 CSW – Competition | .011 (.011)  [-.009, .032] | -.011 (.010)  [-.031, .010] | -.013 (.012)  [-.036, .010] |
| Harassment toward Women 🡪 CSW – Academic Competence | .023 (.014)  [-.004, .050] | .030 (.017)  [-.003, .063] | .037 (.020)  [-.002, .076] |
| Harassment toward Women 🡪 CSW – Competition | .002 (.005)  [-.007, .012] | -.002 (.004)  [-.011, .006] | -.003 (.005)  [-.013, .008] |
| Workplace Inequalities 🡪 CSW – Academic Competence | .004 (.012)  [-.020, .027] | .005 (.016)  [-.026, .035] | .006 (.019)  [-.031, .043] |
| Workplace Inequalities 🡪 CSW – Competition | .001 (.004)  [-.008, .009] | -.001 (.004)  [-.013, .006] | -.001 (.005)  [-.011, .009] |
| Social Expectations 🡪 CSW – Academic Competence | .007 (.011)  [-.016, .029] | .009 (.015)  [-.020, .038] | .011 (.018)  [-.024, .046] |
| Social Expectations 🡪 CSW – Competition | .004 (.005)  [-.006, .014] | -.003 (.005)  [-.015, .006] | -.004 (.006)  [-.015, .007] |

**Table 9S*.***

*Indirect associations between the observed variables in the model with covariate (Study 2).*

*Note*. * *p* < .05; ** *p* < .01; *** *p* < .001.

The significance and direction of most indirect effects remained unchanged. However, the indirect associations between harassment toward women and educational aspirations through academic competence (*p* = .070) and between harassment toward women and academic effort through academic competence (*p* = .066) were not significant. These additional analyses were conducted on a sample size below the recommended threshold for complex mediation analyses, so it is likely that these effects could become significant with a larger sample.
